# Supplementary material for: Microfluidic perfusion system for maintaining viable heart tissue with real-time electrochemical monitoring of reactive oxygen species
Source: Royal Society of Chemistry journal article supplement (doi:10.1039/c004910g), 2010-01-01
Supplement: c004910g.pdf [file c004910g.pdf]

## Electronic supplementary information

### 1 Species confirmation and identification of the monitoring window.

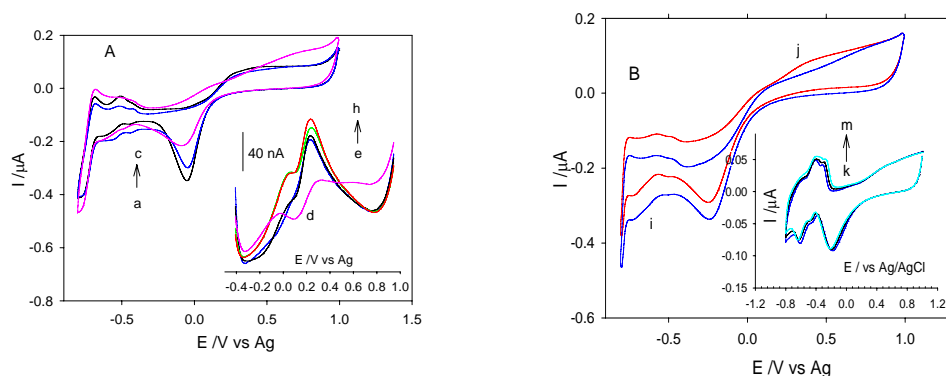

Fig.S1. Voltammetry study of glucose, antibiotics, H<sub>2</sub>O<sub>2</sub> and LDH in PBS and KH solutions. (A) Cyclic voltammetry (CV) scan in 10 mM PBS-0.1 M NaCl, pH 7.4 (b, blue line), containing 5 mM glucose (a, black line), 0.1 mg mL<sup>-1</sup> streptomycin-100 U mL<sup>-1</sup> Penicillin (SP) (c, pink line). Inset A: (d-h) are square wave voltammograms of SP (d, pink line), PBS (e, blue line), 5 mM glucose (f, black line), 120 μM (g, green line) and 140 μM H<sub>2</sub>O<sub>2</sub> (h, red line), respectively. (B) Cyclic voltammetry in KHGB (i, blue line) and in 100 μM H<sub>2</sub>O<sub>2</sub> (j, red line). Flow rate 120 μL min<sup>-1</sup>. Inset B: Cyclic voltammograms in KH (k, blue line) containing LDH 0.0476 U mL<sup>-1</sup> (l, black line) and 0.19 U mL<sup>-1</sup> (m, cyan line), respectively. All solutions were degassed with nitrogen. Scan conditions as given in the Experimental section.

Some constituents of KHGB buffer are redox active and likely to interfere with the electrochemical (EC) measurement of ROS. ESI Fig. S1 displays voltammograms of the individual species in PBS and KH solutions using Pt electrodes. The redox couples of hydrogen adsorption/desorption locate between -0.7 V and -0.4 V in cyclic voltammetry on Pt in PBS solution; corresponding to two pairs of redox peak at -0.52 V/-0.54 V and -0.41 V/-0.42 V (Fig. S1A (b)). The formation (at 0.7 V) and reduction (around -0.03 V) of platinum oxides on Pt surface occur. Oxidation currents (I<sub>O</sub>) showed a slight increase in the presence of 5 mM glucose above 0.25 V (Fig. S1A (a)), correspondingly in SWV at the same potential (Fig. S1A (f)). The H<sub>2</sub>O<sub>2</sub> oxidation current in SWV was confirmed at 0.25 V in PBS ((g) and (h), Fig. S1A inset) and in a flow chamber where the presence of H<sub>2</sub>O<sub>2</sub> gave an increase from 0.2 V to 0.8 V (Fig. S1B, (i)–(j)).

The oxidation current for the two antibiotics increased from 0.45 V in CV (Fig. S1A (c)). In SWV, the oxidation current showed a sharp decrease around 0.2 V and then a rise from 0.5 V (exhibited Fig. S1A inset (d)); suggesting that the presence of antibiotics in buffer might decrease the sensitivity in EC measurement due to the lower current at 0.2 V. Cyclic voltammetry in LDH solution demonstrated only a slight current increase from -0.32 V to -0.4 V during the oxidation scan ((k)–(m) in Fig. S1B); this will not interfere with the oxidation current of H<sub>2</sub>O<sub>2</sub> at 0.2 V in SWV and 0.4 V in CV. LDH was reported previously to have two anodic peaks at 0.07 V and 0.25 V (*vs* Ag/AgCl) on a glass carbon electrode (see reference 32 of the manuscript). In order to lessen the influence of the electrode process from Pt itself, the LDH and species from KHGB buffer, the monitoring window was located between -0.1 V to 1.0 V; the region most dependant on the concentration of H<sub>2</sub>O<sub>2</sub> or total ROS concentration.

**2 Table S1. Standard deviation of currents in Fig. 4: polishing mode**

| Buffer | E <sub>S</sub> -Off<br>O <sub>2</sub> -CO <sub>2</sub><br>(0-30min) | E <sub>S</sub> -on<br>O <sub>2</sub> -CO <sub>2</sub><br>(40-80 min) | E <sub>S</sub> -on<br>O <sub>2</sub> -CO <sub>2</sub> (SWV)<br>(40-80 min) | Insult<br>E <sub>S</sub> -off<br>(90-125 min)              | Insult method<br>(%)                                                                  |
|--------|---------------------------------------------------------------------|----------------------------------------------------------------------|----------------------------------------------------------------------------|------------------------------------------------------------|---------------------------------------------------------------------------------------|
| KHGB   | 0.05873±0.0023<br>(line a)                                          | 0.05687±0.0062<br>(a)                                                | 0.0066 ± 0.0013<br>(e)                                                     | 0.06022 ± 0.0011<br>(TX) (a)<br>± 0.0013 (N <sub>2</sub> ) | TX: <± 10% (CV, a);<br>N <sub>2</sub> : 6 % (CV, b),<br>N <sub>2</sub> : 20% (SWV, e) |
| KHG    |                                                                     | 0.05414±0.0085<br>(b)                                                | 0.03012± 0.0038<br>(d)                                                     | 0.05697 ± 0.0021<br>(N <sub>2</sub> ), (b)                 | < 6% (CV);<br>~ 10% (SWV, d)                                                          |
| KH     |                                                                     | 0.060±0.0063<br>(c)                                                  |                                                                            |                                                            |                                                                                       |

Data are based on triplicate experiments. (a-e) correspond to the lables in Figure 4.

### 3 Evidence of adsorption of species from KH buffers

The potential effect of the species in KH and KHGB on Pt was studied (Fig. S2). Scanning in KH causes little effect to the voltammetric waveshape of N,N,N',N'-tetramethyl-p-phenylenediamine solutions (TMPD). In particular, there is no significant change in  $I_{\text{O}}$  at 0.58 V whilst the cathodic current at 0.058 V increased by about 18%. In KHGB, oxidation current  $I_{\text{O}}$  increased 4.4 % and 17.2% for the reduction current in average ( $n=3$ ).

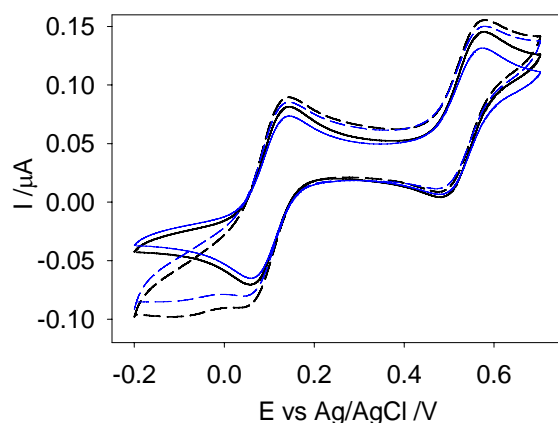

**Fig. S2.** Cyclic voltammetry of Pt electrode in TMPD. CV in 1mM TMPD-0.1 M KCl before (solid line) and after (dash line) 10 scans in blank KH (black) and KHGB (blue), respectively. Scan rate, 0.1  $\text{V s}^{-1}$ .

#### 4 Comparison of H<sub>2</sub>O<sub>2</sub> from chemical assay and ROS by SWV and CV

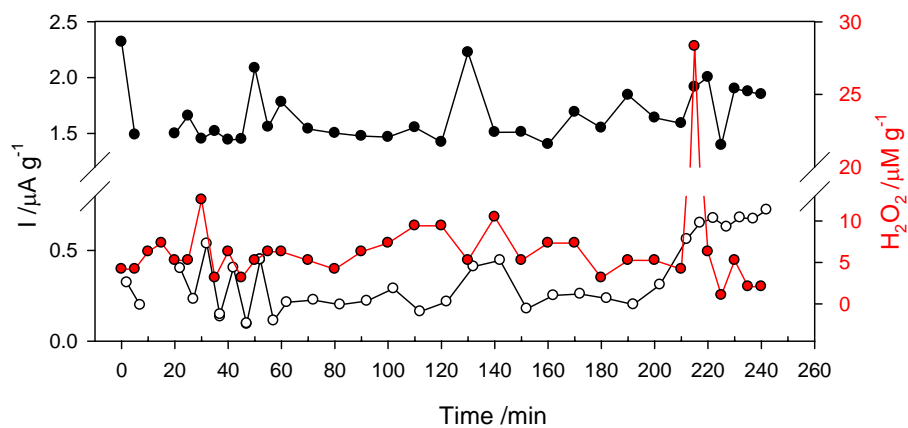

**Fig. S3.** Comparison of H<sub>2</sub>O<sub>2</sub> and ROS by CV and SWV. H<sub>2</sub>O<sub>2</sub> (red\_circles) from Amplex Red assay. ROS level measured by cyclic voltammetry (black circles), and square wave voltammetry (white circles). Others as in Fig. 5B. Scan conditions as given in the Experimental section.

## 5 Linear range study of the oxidation current with H<sub>2</sub>O<sub>2</sub> concentration

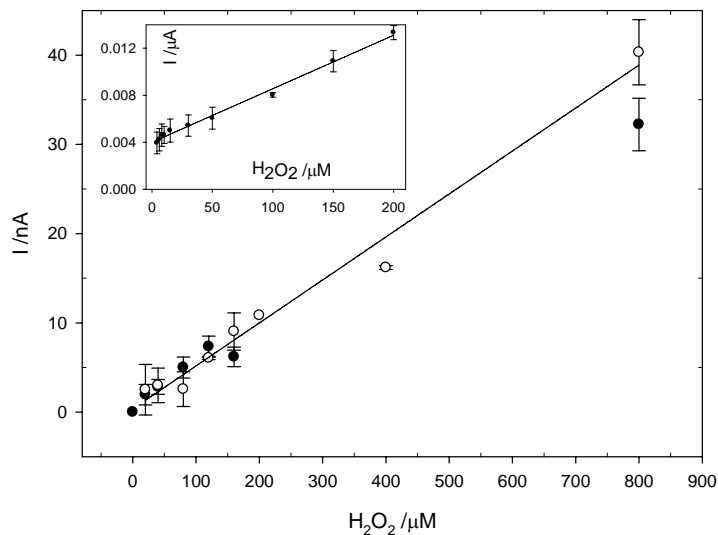

**Fig. S4.** Oxidation current in SWV with concentration of H<sub>2</sub>O<sub>2</sub> measured in oxygenated (Solid circle), and N<sub>2</sub>-saturated (white circle) KHGB. E<sub>s</sub>-off between EC recording. Flow rate, 120  $\mu L \text{ min}^{-1}$ , 37 °C. SWV conditions as given in Experimental section. Inset:  $I = 0.004 + 4.55e-5 C$ ;  $R^2=0.9931$  when the concentration of H<sub>2</sub>O<sub>2</sub> was in the range of 1 to 200  $\mu M$ .
